# Supplementary material
Source: publisher figshare collection journal article supplement (https://karger.figshare.com/ndownloader/files/28613793)
Supplement: Supplementary file 1 [file 28613793]

Online Supplementary Appendix 1

Emma Nichols1, Foad Abd-Allah2, Amir Abdoli3, Eman Abu-Gharbieh4, Jaimie D Adelson1, Rufus Olusola Akinyemi5 6, Fahad Mashhour Alanezi7, Vahid Alipour8 9, Jalal Arabloo8, Getinet Ayano10, Atif Amin Baig11, Maciej Banach12 13, Miguel A Barboza14 15, Suzanne Lyn Barker-Collo16, Bernhard T Baune17 18, Akshaya Srikanth Bhagavathula19 20, Krittika Bhattacharyya21 22, Ali Bijani23, Antonio Biondi24, Atanu Biswas25, Srinivasa Rao Bolla26, Archith Boloor27, Carol Brayne28, Hermann Brenner29, Katrin Burkart1 30, Richard A Burns31, Sharath Burugina Nagaraja32, Luis Alberto Cámera33 34, Felix Carvalho35, Luis F S Castro-de-Araujo36, Ester Cerin37 38, Achille Cernigliaro39, Nicolas Cherbuin31, Jee-Young Jasmine Choi40, Dinh-Toi Chu41, Rosa A S Couto42, Baye Dagnew43, Anh Kim Dang44, Daniel Diaz45 46, Zahra Sadat Dibaji Forooshani47, Shirin Djalalinia48, Paul Narh Doku49, Shaimaa I El-Jaafary2, Khalil Eskandari50 51, Sharareh Eskandarieh52, Farshad Farzadfar53, Valery L Feigin54 1 55, Seyed-Mohammad Fereshtehnejad56 57, Eduarda Fernandes58, Pietro Ferrara59, Irina Filip60 61, Florian Fischer62, Shilpa Gaidhane63, Ahmad Ghashghaee8 64, Alessandro Gialluisi65, Elena V Gnedovskaya66, Mahaveer Golechha67, Mohammad Rifat Haider68, Samer Hamidi69, Graeme J Hankey70 71, Amr Hassan2, Simon I Hay1 30, Mohamed I Hegazy2, Golnaz Heidari72, Reza Heidari-Soureshjani73, Mowafa Househ74, Bing-Fang Hwang75, Licia Iacoviello65 76, Olayinka Stephen Ilesanmi77 78, Irena M Ilic79, Milena D Ilic80, Seyed Sina Naghibi Irvani81, M Mofizul Islam82, Hiroyasu Iso83, Masao Iwagami84 85, Ravi Prakash Jha86 87, Jost B Jonas88 89, Jacek Jerzy Jozwiak90, Rizwan Kalani91, André Karch92, Ayele Semachew Kasa93, Mahalaqua Nazli Khatib94, Yun Jin Kim95, Adnan Kisa97 98, Sezer Kisa96, Ai Koyanagi99 100, Walter A Kukull101, Manasi Kumar102 103, Iván Landires104 105, Kate E LeGrand1, Matilde Leonardi106, Bingyu Li107, Xuefeng Liu108, Giancarlo Logroscino109 110, Stefan Lorkowski111 112, Hawraz Ibrahim M. Amin113 114, Shilpashree Madhava Kunjathur115, Narayana Manjunatha116, Birhanu Geta Meharie117, Man Mohan Mehndiratta118 119, Workua Mekonnen Metekiya120, Norlinah Mohamed Ibrahim121, Yousef Mohammad122, Salahuddin Mohammed123 124, Archisman Mohapatra125, Ali H Mokdad1 30, Stefania Mondello126, Ghobad Moradi127 128, Tilahun Belete Mossie129, Gabriele Nagel130, Mukhammad David Naimzada131 132, Dr Muhammad Naveed133, Vinod C Nayak134, Cuong Tat Nguyen44, Huong Lan Thi Nguyen44, Son Hoang Nguyen135, Virginia Nunez-Samudio136 137, Andrew T Olagunju138 139, Sergej M Ostojic140, Samuel M Ostroff1 141, Nikita Otstavnov131, Stanislav S Otstavnov131 142, Mayowa O Owolabi143 144, Songhomitra Panda-Jonas88, Urvish K Patel145, Mona Pathak146, Hamidreza Pazoki Toroudi147 148, Carrie B Peterson149, Hai Quang Pham44, Marina Pinheiro150, Michael A Piradov55, Faheem Hyder Pottoo151, Akram Pourshams152, Sergio I Prada153 154, Dimas Ria Angga Pribadi155, Amir Radfar156, Alberto Raggi106, Fakher Rahim157 158, Pradhum Ram159, Juwel Rana160 161, Vahid Rashedi162, David Laith Rawaf165 166, Salman Rawaf163 164, Nickolas Reinig1, Nima Rezaei167 168, Aziz Rezapour8, Stephen R Robinson169, Michele Romoli170 171, Gholamreza Roshandel172, Perminder S Sachdev173 174, Amirhossein Sahebkar175 176, Mohammad Ali Sahraian52, Davide Sattin106, Monika Sawhney177, Mete Saylan178, Silvia Schiavolin106, Feng Sha179, Izza Shahid180, Masood Ali Shaikh181, David H Shaw1, Mika Shigematsu182, Jae Il Shin183, Rahman Shiri184, Tariq Jamal Siddiqi185, João Pedro Silva35, Jasvinder A Singh186 187, Deepika Singhal188 189, Amin Soheili190, Cassandra E I Szoeke191 192, Rafael Tabarés-Seisdedos193 194, Biruk Wogayehu Taddele195, Bhaskar Thakur196 197, Marcos Roberto Tovani-Palone198 199, Bach Xuan Tran200, Ravensara S Travillian1, Gebiyaw Wudie Tsegaye201, Muhammad Shariq Usman202, Marco Vacante24, Pascual R Valdez203 204, Diana Zuleika Velazquez46, Narayanaswamy Venketasubramanian205 206, Vasily Vlassov207, Giang Thu Vu135, Yuan-Pang Wang208, Abrha Hailay Weldemariam209, Ronny Westerman210, Chenkai Wu211 212, Ali Yadollahpour213, Kazumasa Yamagishi214 215, Yuichiro Yano216, Yordanos Gizachew Yeshitila217, Naohiro Yonemoto218 219, Chuanhua Yu220 221, Zhi-Jiang Zhang222, Christopher J L Murray1 30, and Theo Vos1 30.

1 Institute for Health Metrics and Evaluation, University of Washington, Seattle, WA, USA.

2 Department of Neurology, Cairo University, Cairo, Egypt.

3 Department of Parasitology and Mycology, Jahrom University of Medical Sciences, Jahrom, Iran.

4 Department of Clinical Sciences, University of Sharjah, Sharjah, United Arab Emirates.

5 Institute for Advanced Medical Research and Training, University of Ibadan, Ibadan, Nigeria.

6 Institute of Neuroscience, Newcastle University, Newcastle upon Tyne, UK.

7 Imam Abdulrahman Bin Faisal University, Dammam, Saudi Arabia.

8 Health Management and Economics Research Center, Iran University of Medical Sciences, Tehran, Iran.

9 Health Economics Department, Iran University of Medical Sciences, Tehran, Iran.

10 School of Public Health, Curtin University, Perth, WA, Australia.

11 Unit of Biochemistry, Sultan Zainal Abidin University (Universiti Sultan Zainal Abidin), Kuala Terengganu, Malaysia.

12 Department of Hypertension, Medical University of Lodz, Lodz, Poland.

13 Polish Mothers’ Memorial Hospital Research Institute, Lodz, Poland.

14 Department of Neurosciences, Costa Rican Department of Social Security, San Jose, Costa Rica.

15 School of Medicine, University of Costa Rica, San Pedro, Costa Rica.

16 School of Psychology, University of Auckland, Auckland, New Zealand.

17 Department of Psychiatry, University of Münster, Münster, Germany.

18 Department of Psychiatry, Melbourne Medical School, Melbourne, VIC, Australia.

19 Department of Social and Clinical Pharmacy, Charles University, Hradec Kralova, Czech Republic.

20 Institute of Public Health, United Arab Emirates University, Al Ain, United Arab Emirates.

21 Department of Statistical and Computational Genomics, National Institute of Biomedical Genomics, Kalyani, India.

22 Department of Statistics, University of Calcutta, Kolkata, India.

23 Social Determinants of Health Research Center, Babol University of Medical Sciences, Babol, Iran.

24 Department of General Surgery and Medical-Surgical Specialties, University of Catania, Catania, Italy.

25 Department of Neurology, Institute of Post-Graduate Medical Education and Research and Seth Sukhlal Karnani Memorial Hospital, Kolkata, India.

26 Department of Biomedical Sciences, Nazarbayev University, Nur-Sultan City, Kazakhstan.

27 Department of Internal Medicine, Manipal Academy of Higher Education, Mangalore, India.

28 Department of Public Health and Primary Care, University of Cambridge, Cambridge, UK.

29 Division of Clinical Epidemiology and Aging Research, German Cancer Research Center, Heidelberg, Germany.

30 Department of Health Metrics Sciences, School of Medicine, University of Washington, Seattle, WA, USA.

31 Research School of Population Health, Australian National University, Canberra, ACT, Australia.

32 Department of Community Medicine, Employee State Insurance Post Graduate Institute of Medical Sciences and Research, Bangalore, India.

33 Internal Medicine Department, Hospital Italiano de Buenos Aires, Buenos Aires, Argentina.

34 Board of Directors, Argentine Society of Medicine, Buenos Aires, Argentina.

35 Research Unit on Applied Molecular Biosciences (UCIBIO), University of Porto, Porto, Portugal.

36 Department of Psychiatry, University of Melbourne, Melbourne, VIC, Australia.

37 Mary MacKillop Institute for Health Research, Australian Catholic University, Melbourne, VIC, Australia.

38 School of Public Health, University of Hong Kong, Hong Kong, China.

39 Regional Epidemiological Observatory Department, Sicilian Regional Health Authority, Palermo, Italy.

40 Biomedical Informatics, Seoul National University Hospital, Seoul, South Korea.

41 Faculty of Biology, Hanoi National University of Education, Hanoi, Vietnam.

42 Department of Chemical Sciences, University of Porto, Porto, Portugal.

43 Department of Human Physiology, University of Gondar, Gondar, Ethiopia.

44 Institute for Global Health Innovations, Duy Tan University, Hanoi, Vietnam.

45 Center of Complexity Sciences, National Autonomous University of Mexico, Mexico City, Mexico.

46 Faculty of Veterinary Medicine and Zootechnics, Autonomous University of Sinaloa, Culiacán Rosales, Mexico.

47 Tehran University of Medical Sciences, Tehran, Iran.

48 Development of Research and Technology Center, Ministry of Health and Medical Education, Tehran, Iran.

49 School of Nursing and Midwifery, University of Cape Coast, Cape Coast, Ghana.

50 Department of Medicinal Chemistry, Kerman University of Medical Sciences, Kerman, Iran.

51 Pharmaceutics Research Center, Kerman University of Medical Sciences, Kerman, Iran.

52 Multiple Sclerosis Research Center, Tehran University of Medical Sciences, Tehran, Iran.

53 Non-communicable Diseases Research Center, Tehran University of Medical Sciences, Tehran, Iran.

54 National Institute for Stroke and Applied Neurosciences, Auckland University of Technology, Auckland, New Zealand.

55 Research Center of Neurology, Moscow, Russia.

56 Department of Neurobiology, Karolinska Institute, Stockholm, Sweden.

57 Division of Neurology, University of Ottawa, Ottawa, ON, Canada.

58 Associated Laboratory for Green Chemistry (LAQV), University of Porto, Porto, Portugal.

59 Research Center on Public Health, University of Milan Bicocca, Monza, Italy.

60 Psychiatry Department, Kaiser Permanente, Fontana, CA, USA.

61 School of Health Sciences, A.T. Still University, Mesa, AZ, USA.

62 Institute of Gerontological Health Services and Nursing Research, Ravensburg-Weingarten University of Applied Sciences, Weingarten, Germany.

63 Department of Medicine, Datta Meghe Institute of Medical Science, Wardha, India.

64 Student Research Committee, Iran University of Medical Sciences, Tehran, Iran.

65 Department of Epidemiology and Prevention, IRCCS Neuromed, Pozzilli, Italy.

66 Third Department of Neurology, Research Center of Neurology, Moscow, Russia.

67 Health Systems and Policy Research, Indian Institute of Public Health Gandhinagar, Gandhinagar, India.

68 Department of Social and Public Health, Ohio University, Athens, OH, USA.

69 School of Health and Environmental Studies, Hamdan Bin Mohammed Smart University, Dubai, United Arab Emirates.

70 Medical School, University of Western Australia, Perth, WA, Australia.

71 Department of Neurology, Sir Charles Gairdner Hospital, Perth, WA, Australia.

72 Independent Consultant, Santa Clara, CA, USA.

73 School of Nursing and Midwifery, Tehran University of Medical Sciences, Tehran, Iran.

74 College of Science and Engineering, Hamad Bin Khalifa University, Doha, Qatar.

75 Department of Occupational Safety and Health, China Medical University, Taichung, Taiwan.

76 Research Center in Epidemiology and Preventive Medicine (EPIMED), Department of Medicine and Surgery, University of Insubria, Varese, Italy.

77 Department of Community Medicine, University of Ibadan, Ibadan, Nigeria.

78 Department of Community Medicine, University College Hospital, Ibadan, Ibadan, Nigeria.

79 Faculty of Medicine, University of Belgrade, Belgrade, Serbia.

80 Department of Epidemiology, University of Kragujevac, Kragujevac, Serbia.

81 Research Institute for Endocrine Sciences, Shahid Beheshti University of Medical Sciences, Tehran, Iran.

82 School of Psychology and Public Health, La Trobe University, Melbourne, VIC, Australia.

83 Public Health Department of Social Medicine, Osaka University, Suita, Japan.

84 Department of Health Services Research, University of Tsukuba, Tsukuba, Japan.

85 Department of Non-Communicable Disease Epidemiology, London School of Hygiene & Tropical Medicine, London, UK.

86 Department of Community Medicine, Baba Saheb Ambedkar Medical College & Hospital, Delhi, India.

87 Department of Community Medicine, Banaras Hindu University, Varanasi, India.

88 Department of Ophthalmology, Heidelberg University, Heidelberg, Germany.

89 Beijing Institute of Ophthalmology, Beijing Tongren Hospital, Beijing, China.

90 Department of Family Medicine and Public Health, University of Opole, Opole, Poland.

91 Department of Neurology, University of Washington, Seattle, WA, USA.

92 Institute for Epidemiology and Social Medicine, University of Münster, Münster, Germany.

93 Department of Adult Health Nursing, Bahir Dar University, Bahir Dar, Ethiopia.

94 Global Evidence Synthesis Initiative, Datta Meghe Institute of Medical Sciences, Wardha, India.

95 School of Traditional Chinese Medicine, Xiamen University Malaysia, Sepang, Malaysia.

96 Department of Nursing and Health Promotion, Oslo Metropolitan University, Oslo, Norway.

97 School of Health Sciences, Kristiania University College, Oslo, Norway.

98 Global Community Health and Behavioral Sciences, Tulane University, New Orleans, LA, USA.

99 CIBERSAM, San Juan de Dios Sanitary Park, Sant Boi de Llobregat, Spain.

100 Catalan Institution for Research and Advanced Studies (ICREA), Barcelona, Spain.

101 Department of Epidemiology, University of Washington, Seattle, WA, USA.

102 Department of Psychiatry, University of Nairobi, Nairobi, Kenya.

103 Division of Psychology and Language Sciences, University College London, London, UK.

104 Unit of Genetics and Public Health, Institute of Medical Sciences, Las Tablas, Panama.

105 Ministry of Health, Herrera, Panama.

106 Neurology, Public Health and Disability Unit, Carlo Besta Neurological Institute IRCCS (Fondazione IRCCS Istituto Neurologico Carlo Besta), Milan, Italy.

107 Department of Sociology, Shenzhen University, Shenzhen, China.

108 Department of Systems, Populations, and Leadership, University of Michigan, Ann Arbor, MI, USA.

109 Department of Basic Medical Sciences, Neuroscience and Sense Organs, University of Bari Aldo Moro, Bari, Italy.

110 Department of Clinical Research in Neurology, Fondazione Cardinale Giovanni Panico Hospital, Tricase, Italy.

111 Institute of Nutritional Sciences, Friedrich Schiller University Jena, Jena, Germany.

112 Competence Cluster for Nutrition and Cardiovascular Health (nutriCARD), Jena, Germany.

113 Department of Pharmaceutical Science, University of Eastern Piedmont, Novara, Italy.

114 Chemistry Department, Salahaddin University-Erbil, Erbil, Iraq.

115 Department of Biochemistry, BGS Global Institute of Medical Sciences, Bengaluru, India.

116 Department of Psychiatry, National Institute of Mental Health and Neurosciences, Bengalore, India.

117 Department of Pharmacy, Wollo University, Dessie, Ethiopia.

118 Neurology Department, Janakpuri Super Specialty Hospital Society, New Delhi, India.

119 Department of Neurology, Govind Ballabh Institute of Medical Education and Research, New Delhi, India.

120 Department of Psychiatry, Mekelle University, Mekelle, Ethiopia.

121 Department of Medicine, National University of Malaysia Medical Center, Bandar Tun Razak, Malaysia.

122 Internal Medicine Department, King Saud University, Riyadh, Saudi Arabia.

123 Department of Biomolecular Sciences, University of Missippi, Oxford, MS, USA.

124 Department of Pharmacy, Mizan-Tepi University, Mizan, Ethiopia.

125 Epidemiology Department, GRID Council, Bhubaneswar, India.

126 Department of Biomedical and Dental Sciences and Morphofunctional Imaging, Messina University, Messina, Italy.

127 Social Determinants of Health Research Center, Kurdistan University of Medical Sciences, Sanandaj, Iran.

128 Department of Epidemiology and Biostatistics, Kurdistan University of Medical Sciences, Sanandaj, Iran.

129 Department of Psychiatry, Bahir Dar University, Bahir Dar, Ethiopia.

130 Institute of Epidemiology and Medical Biometry, Ulm University, Ulm, Germany.

131 Laboratory of Public Health Indicators Analysis and Health Digitalization, Moscow Institute of Physics and Technology, Dolgoprudny, Russia.

132 Experimental Surgery and Oncology Laboratory, Kursk State Medical University, Kursk, Russia.

133 Department of Biotechnology, University of Central Punjab, Lahore, Pakistan.

134 Department of Forensic Medicine and Toxicology, Manipal Academy of Higher Education, Manipal, India.

135 Center of Excellence in Behavioral Medicine, Nguyen Tat Thanh University, Ho Chi Minh City, Vietnam.

136 Unit of Microbiology and Public Health, Institute of Medical Sciences, Las Tablas, Panama.

137 Department of Public Health, Ministry of Health, Herrera, Panama.

138 Department of Psychiatry and Behavioural Neurosciences, McMaster University, Hamilton, ON, Canada.

139 Department of Psychiatry, University of Lagos, Lagos, Nigeria.

140 Department of Biomedical Sciences, University of Novi Sad, Novi Sad, Serbia.

141 Henry M Jackson School of International Studies, University of Washington, Seattle, WA, USA.

142 Department of Project Management, National Research University Higher School of Economics, Moscow, Russia.

143 Department of Medicine, University of Ibadan, Ibadan, Nigeria.

144 Department of Medicine, University College Hospital Ibadan, Ibadan, Nigeria.

145 Department of Neurology and Public Health, Icahn School of Medicine at Mount Sinai, New York, NY, USA.

146 Research & Development Department, Kalinga Institute of Medical Sciences, Bhubaneswar, India.

147 Department of Physiology, Iran University of Medical Sciences, Tehran, Iran.

148 Physiology Research Center, Iran University of Medical Sciences, Tehran, Iran.

149 Gerontology, Dementia and Digital Health, Independent Consultant, Copenhagen, Denmark.

150 Department of Chemistry, University of Porto, Porto, Portugal.

151 Department of Pharmacology, Imam Abdulrahman Bin Faisal University, Dammam, Saudi Arabia.

152 Digestive Diseases Research Institute, Tehran University of Medical Sciences, Tehran, Iran.

153 Clinical Research Center, Valle del Lili Foundation (Centro de Investigaciones Clinicas, Fundación Valle del Lili), Cali, Colombia.

154 PROESA, ICESI University (Centro PROESA, Universidad ICESI), Cali, Colombia.

155 Health Sciences Department, Muhammadiyah University of Surakarta, Sukoharjo, Indonesia.

156 College of Medicine, University of Central Florida, Orlando, FL, USA.

157 Thalassemia and Hemoglobinopathy Research Center, Ahvaz Jundishapur University of Medical Sciences, Ahvaz, Iran.

158 Metabolomics and Genomics Research Center, Tehran University of Medical Sciences, Tehran, Iran.

159 Department of Cardiology, Emory University, Atlanta, GA, USA.

160 Department of Public Health, North South University, Dhaka, Bangladesh.

161 Department of Biostatistics and Epidemiology, University of Massachusetts Amherst, Amherst, MA, USA.

162 Tehran Institute of Psychiatry, Iran University of Medical Sciences, Tehran, Iran.

163 Department of Primary Care and Public Health, Imperial College London, London, UK.

164 Academic Public Health England, Public Health England, London, UK.

165 WHO Collaborating Centre for Public Health Education and Training, Imperial College London, London, UK.

166 University College London Hospitals, London, UK.

167 Research Center for Immunodeficiencies, Tehran University of Medical Sciences, Tehran, Iran.

168 Network of Immunity in Infection, Malignancy and Autoimmunity (NIIMA), Universal Scientific Education and Research Network (USERN), Tehran, Iran.

169 Department of Psychology, Royal Melbourne Institute of Technology University, Bundoora, VIC, Australia.

170 Department of Neuroscience, University of Perugia, Perugia, Italy.

171 Department of Neurology, Rimini ‘Infermi’ Hospital - AUSL Romagna, Rimini, Italy.

172 Golestan Research Center of Gastroenterology and Hepatology (GRCGH), Golestan University of Medical Sciences, Gorgan, Iran.

173 School of Psychiatry, University of New South Wales, Kensington, NSW, Australia.

174 Neuropsychiatric Institute, Prince of Wales Hospital, Randwick, NSW, Australia.

175 Halal Research Center of IRI, Food and Drug Administration of the Islamic Republic of Iran, Tehran, Iran.

176 Neurogenic Inflammation Research Center, Mashhad University of Medical Sciences, Mashhad, Iran.

177 Department of Public Health Sciences, University of North Carolina at Charlotte, Charlotte, NC, USA.

178 Market Access, Bayer, Istanbul, Turkey.

179 Center for Biomedical Information Technology, Shenzhen Institutes of Advanced Technology, Shenzhen, China.

180 Department of Internal Medicine, Ziauddin University, Karachi, Pakistan.

181 Independent Consultant, Karachi, Pakistan.

182 National Institute of Infectious Diseases, Tokyo, Japan.

183 College of Medicine, Yonsei University, Seoul, South Korea.

184 Finnish Institute of Occupational Health, Helsinki, Finland.

185 Department of Medicine, Dow University of Health Sciences, Karachi, Pakistan.

186 School of Medicine, University of Alabama at Birmingham, Birmingham, AL, USA.

187 Medicine Service, US Department of Veterans Affairs (VA), Birmingham, AL, USA.

188 Department of Ophthalmology, Gmers Medical College and Civil Hospital, Ahmedabad, India.

189 Department of Opthalmology, Datta Meghe Institute of Medical Sciences, Wardha, India.

190 Nursing Care Research Center, Semnan University of Medical Sciences, Semnan, Iran.

191 Faculty of Medicine, Dentistry and Health Sciences, University of Melbourne, Melbourne, VIC, Australia.

192 The Brain Institute, Australian Healthy Ageing Organisation, Melbourne, VIC, Australia.

193 Department of Medicine, University of Valencia, Valencia, Spain.

194 Carlos III Health Institute, Biomedical Research Networking Center for Mental Health Network (CiberSAM), Madrid, Spain.

195 Department of Pharmacy, Arbaminch College of Health Sciences, Arba Minch, Ethiopia.

196 Division of Biostatistics and Epidemiology, Texas Tech University, El Paso, TX, USA.

197 Massachusetts Veterans Epidemiology Research and Information Center (MAVERIC) & CSP Coordinating Center, Harvard University, Boston, MA, USA.

198 Department of Pathology and Legal Medicine, University of São Paulo, Ribeirão Preto, Brazil.

199 Modestum LTD, London, UK.

200 Department of Health Economics, Hanoi Medical University, Hanoi, Vietnam.

201 College of Medicine and Health Sciences, Bahir Dar University, Bahir Dar, Ethiopia.

202 Department of Internal Medicine, Dow University of Health Sciences, Karachi, Pakistan.

203 Argentine Society of Medicine, Buenos Aires, Argentina.

204 Velez Sarsfield Hospital, Buenos Aires, Argentina.

205 Raffles Neuroscience Centre, Raffles Hospital, Singapore, Singapore.

206 Yong Loo Lin School of Medicine, National University of Singapore, Singapore, Singapore.

207 Department of Health Care Administration and Economics, National Research University Higher School of Economics, Moscow, Russia.

208 Department of Psychiatry, University of São Paulo, São Paulo, Brazil.

209 Department of Adult Health Nursing, Aksum University, Aksum, Ethiopia.

210 Competence Center of Mortality-Follow-Up of the German National Cohort, Federal Institute for Population Research, Wiesbaden, Germany.

211 Global Health Research Center, Duke Kunshan University, Kunshan, China.

212 Duke Global Health Institute, Duke University, Durham, NC, USA.

213 Psychology Department, University of Sheffield, Sheffield, UK.

214 Research and Development Center for Health Services, University of Tsukuba, Tsukuba, Japan.

215 Graduate School of Medicine, Osaka University, Suita, Japan.

216 Department of Family Medicine and Community Health, Duke University, Durham, IL, USA.

217 Department of Nursing, Arba Minch University, Arba Minch, Ethiopia.

218 Department of Neuropsychopharmacology, National Center of Neurology and Psychiatry, Kodaira, Japan.

219 Department of Public Health, Juntendo University, Tokyo, Japan.

220 Department of Epidemiology and Biostatistics, Wuhan University, Wuhan, China.

221 Global Health Institute, Wuhan University, Wuhan, China.

222 School of Medicine, Wuhan University, Wuhan, China.
